# Supplementary material for: Targeting Mitochondria with Avocatin B Induces Selective Leukemia Cell Death
Source: Oxford University Press journal article supplement (doi:10.1158/0008-5472.can-14-2676), 2015-06-14
Supplement: 00085472can142676-sup-137670_2_supp_0_nmyt3y.docx [file 00085472can142676-sup-137670_2_supp_0_nmyt3y.docx]

Supplementary Table S1: Summary of EC50 values for avocatin B in a panel of AML cell lines.

| **Cell line** | **EC50 (µM)** | **95% CI** |
| --- | --- | --- |
| **TEX** | 1.271 | 0.5100 to 2.032 |
| **KG1A** | 25.43 | 23.49 to 27.36 |
| **OCI-AML2** | 25.20 | 24.18 to 26.22 |
| **JURKAT** | 9.974 | 8.028 to 11.92 |

| Supplementary Table S2: AML patient sample details used for annexin/PI. | | |  |
| --- | --- | --- | --- |
| **Label #** | **CD34 (%)** | **Interpretation** | | |
| AML1 | 77 | 43~44,XX,dic(3;12)(p13;p11.2),-5,-7,+del(11)(q13),?dup(18)(q21q22),del(20)(q13.1), -22,+mar[cp10] | | |
| AML2 | 88 | 44~48,XX,del(5)(q13q33),i(9)(p10),-18,add(20)(q13.3),+mar[cp17]/46,XX[3] | | |
| AML3 | 87 | 46,XX,t(2;8)(p13;q22)[20].ish t(2;8)(MYC+;MYC-) | | |
| AML4 | 1 | NPM, Flt3-TKD | | |
| AML5 | 60 | ** | | |
| AML5 | 77 | Del 5q | | |
| ** Denotes unknown/not tested    Supplementary Table S3: AML patient sample details used for colony formation assays. | | |
|  | | |
| **Label #** | **CD34 (%)** | **Interpretation** | | |
| AML6 | ** | 43,XY,del(5)(q13q33),-7,t(9;12)(q12;q12),der(16)t(16;17)(q12.1;q21), -17,-18[4]/44,idem,+8[2]/46,XY[3] | | |
| AML7 | ** | 46,XX,t(9;11)(p22;q23)[20] | | |
| AML8 | ** | 46,XY,del(5)(q22q31)[20] | | |

** Denotes unknown/not tested
